# Supplementary material for: Burden, clinical features and outcomes of post-tuberculosis lung disease in sub-Saharan Africa: a protocol for a systematic review and meta-analysis
Source: HighWire-hosted journal article supplement (doi:10.1136/bmjopen-2022-062260), 2022-08-01
Supplement: bmjopen-2022-062260supp001_data_supplement.pdf [file bmjopen-2022-062260supp001_data_supplement.pdf]

## Search Strategy for Embase

| No. | Query                                                                                                                                                                                                                                                                                                                                                                                                                                                                                                                                                                                                                                                                                                                                                                                                                                                                                                                                                                                                                                                                                                                                                                                                                                                                                                                                                                                                                                                                                                                                                                                                                                                                                                                                                                                                                                                                                                                                                                                                                                                                                                                                                                                                                                                                                                                                                                                                                                                                                                                                                                                                                                                                                                                                                                                                                                                                                                                                                                                                                                                                                                                                                                                                                                    |
|-----|------------------------------------------------------------------------------------------------------------------------------------------------------------------------------------------------------------------------------------------------------------------------------------------------------------------------------------------------------------------------------------------------------------------------------------------------------------------------------------------------------------------------------------------------------------------------------------------------------------------------------------------------------------------------------------------------------------------------------------------------------------------------------------------------------------------------------------------------------------------------------------------------------------------------------------------------------------------------------------------------------------------------------------------------------------------------------------------------------------------------------------------------------------------------------------------------------------------------------------------------------------------------------------------------------------------------------------------------------------------------------------------------------------------------------------------------------------------------------------------------------------------------------------------------------------------------------------------------------------------------------------------------------------------------------------------------------------------------------------------------------------------------------------------------------------------------------------------------------------------------------------------------------------------------------------------------------------------------------------------------------------------------------------------------------------------------------------------------------------------------------------------------------------------------------------------------------------------------------------------------------------------------------------------------------------------------------------------------------------------------------------------------------------------------------------------------------------------------------------------------------------------------------------------------------------------------------------------------------------------------------------------------------------------------------------------------------------------------------------------------------------------------------------------------------------------------------------------------------------------------------------------------------------------------------------------------------------------------------------------------------------------------------------------------------------------------------------------------------------------------------------------------------------------------------------------------------------------------------------------|
| #1  | 'africa south of the sahara'/exp                                                                                                                                                                                                                                                                                                                                                                                                                                                                                                                                                                                                                                                                                                                                                                                                                                                                                                                                                                                                                                                                                                                                                                                                                                                                                                                                                                                                                                                                                                                                                                                                                                                                                                                                                                                                                                                                                                                                                                                                                                                                                                                                                                                                                                                                                                                                                                                                                                                                                                                                                                                                                                                                                                                                                                                                                                                                                                                                                                                                                                                                                                                                                                                                         |
| #2  | angola*:ab,ti,ff,ad,cy OR benin:ab,ti,ff,ad,cy OR beninese*:ab,ti,ff,ad,cy OR<br>botswana*:ab,ti,ff,ad,cy OR 'bobo dioulasso':ab,ti,ff,ad,cy OR 'burkina faso':ab,ti,ff,ad,cy OR<br>burkinese:ab,ti,ff,ad,cy OR burkinabe:ab,ti,ff,ad,cy OR burundi*:ab,ti,ff,ad,cy OR<br>cameroon*:ab,ti,ff,ad,cy OR 'cabo verde*':ab,ti,ff,ad,cy OR 'cape verde*':ab,ti,ff,ad,cy OR<br>'central african*':ab,ti,ff,ad,cy OR chad:ab,ti,ff,ad,cy OR chadian*:ab,ti,ff,ad,cy OR<br>comoros:ab,ti,ff,ad,cy OR comorian:ab,ti,ff,ad,cy OR congo:ab,ti,ff,ad,cy OR<br>congolese:ab,ti,ff,ad,cy OR brazzaville:ab,ti,ff,ad,cy OR 'cote d ivoire':ab,ti,ff,ad,cy OR<br>ivorian:ab,ti,ff,ad,cy OR ivorians:ab,ti,ff,ad,cy OR djibouti:ab,ti,ff,ad,cy OR<br>djiboutian*:ab,ti,ff,ad,cy OR 'equatorial guinea':ab,ti,ff,ad,cy OR eritrea:ab,ti,ff,ad,cy OR<br>eritirean:ab,ti,ff,ad,cy OR eritreans:ab,ti,ff,ad,cy OR eswatini:ab,ti,ff,ad,cy OR<br>swazi:ab,ti,ff,ad,cy OR swati:ab,ti,ff,ad,cy OR ethiopia*:ab,ti,ff,ad,cy OR gabon:ab,ti,ff,ad,cy<br>OR gabonese:ab,ti,ff,ad,cy OR gaonaise:ab,ti,ff,ad,cy OR gambia*:ab,ti,ff,ad,cy OR<br>ghana:ab,ti,ff,ad,cy OR ghanian:ab,ti,ff,ad,cy OR ghanians:ab,ti,ff,ad,cy OR<br>guinea:ab,ti,ff,ad,cy OR guinean:ab,ti,ff,ad,cy OR guineans:ab,ti,ff,ad,cy OR<br>bissau:ab,ti,ff,ad,cy OR kenya:ab,ti,ff,ad,cy OR kenyan:ab,ti,ff,ad,cy OR kenyans:ab,ti,ff,ad,cy<br>OR kinshasha:ab,ti,ff,ad,cy OR lesotho:ab,ti,ff,ad,cy OR lesothan:ab,ti,ff,ad,cy OR<br>lesothans:ab,ti,ff,ad,cy OR liberia:ab,ti,ff,ad,cy OR liberian:ab,ti,ff,ad,cy OR<br>liberians:ab,ti,ff,ad,cy OR madagascar:ab,ti,ff,ad,cy OR malagasy:ab,ti,ff,ad,cy OR<br>malawi*:ab,ti,ff,ad,cy OR mali:ab,ti,ff,ad,cy OR malian:ab,ti,ff,ad,cy OR malians:ab,ti,ff,ad,cy<br>OR mauritania:ab,ti,ff,ad,cy OR mauritanian:ab,ti,ff,ad,cy OR mauritians:ab,ti,ff,ad,cy OR<br>mauritiu:ab,ti,ff,ad,cy OR mauritian:ab,ti,ff,ad,cy OR mauritians:ab,ti,ff,ad,cy OR<br>mayotte*:ab,ti,ff,ad,cy OR mahoran*:ab,ti,ff,ad,cy OR maorais:ab,ti,ff,ad,cy OR<br>mozambi*:ab,ti,ff,ad,cy OR namibia*:ab,ti,ff,ad,cy OR niger:ab,ti,ff,ad,cy OR<br>nigerois:ab,ti,ff,ad,cy OR nigerien:ab,ti,ff,ad,cy OR nigeria*:ab,ti,ff,ad,cy OR<br>reunion:ab,ti,ff,ad,cy OR reunionese:ab,ti,ff,ad,cy OR rwanda:ab,ti,ff,ad,cy OR<br>rwandan*:ab,ti,ff,ad,cy OR 'saint helena':ab,ti,ff,ad,cy OR helenian*:ab,ti,ff,ad,cy OR 'sao<br>tome e principe':ab,ti,ff,ad,cy OR 'sao tomean*':ab,ti,ff,ad,cy OR senegal*:ab,ti,ff,ad,cy OR<br>seychell*:ab,ti,ff,ad,cy OR seychelloise:ab,ti,ff,ad,cy OR seselwa:ab,ti,ff,ad,cy OR 'sierra<br>leone*':ab,ti,ff,ad,cy OR somalia*:ab,ti,ff,ad,cy OR 'south africa':ab,ti,ff,ad,cy OR 'south<br>african':ab,ti,ff,ad,cy OR 'south sudan':ab,ti,ff,ad,cy OR sudan:ab,ti,ff,ad,cy OR<br>sudanese:ab,ti,ff,ad,cy OR swaziland:ab,ti,ff,ad,cy OR tanzania*:ab,ti,ff,ad,cy OR<br>togo:ab,ti,ff,ad,cy OR togolese:ab,ti,ff,ad,cy OR uganda*:ab,ti,ff,ad,cy OR 'western<br>sahara':ab,ti,ff,ad,cy OR zaire:ab,ti,ff,ad,cy OR zairian*:ab,ti,ff,ad,cy OR zambia*:ab,ti,ff,ad,cy<br>OR zimbabwe*:ab,ti,ff,ad,cy OR zimbo:ab,ti,ff,ad,cy OR 'south of the sahara':ab,ti,ff,ad,cy OR<br>'sub saharan':ab,ti,ff,ad,cy OR subsaharan:ab,ti,ff,ad,cy |
| #3  | #1 OR #2                                                                                                                                                                                                                                                                                                                                                                                                                                                                                                                                                                                                                                                                                                                                                                                                                                                                                                                                                                                                                                                                                                                                                                                                                                                                                                                                                                                                                                                                                                                                                                                                                                                                                                                                                                                                                                                                                                                                                                                                                                                                                                                                                                                                                                                                                                                                                                                                                                                                                                                                                                                                                                                                                                                                                                                                                                                                                                                                                                                                                                                                                                                                                                                                                                 |
| #4  | 'tuberculosis destroyed lung':ab,ti OR topd:ab,ti OR piat:ab,ti OR 'tuberculosis associated<br>pulmonary disease':ab,ti                                                                                                                                                                                                                                                                                                                                                                                                                                                                                                                                                                                                                                                                                                                                                                                                                                                                                                                                                                                                                                                                                                                                                                                                                                                                                                                                                                                                                                                                                                                                                                                                                                                                                                                                                                                                                                                                                                                                                                                                                                                                                                                                                                                                                                                                                                                                                                                                                                                                                                                                                                                                                                                                                                                                                                                                                                                                                                                                                                                                                                                                                                                  |
| #5  | 'tuberculosis complications'/exp                                                                                                                                                                                                                                                                                                                                                                                                                                                                                                                                                                                                                                                                                                                                                                                                                                                                                                                                                                                                                                                                                                                                                                                                                                                                                                                                                                                                                                                                                                                                                                                                                                                                                                                                                                                                                                                                                                                                                                                                                                                                                                                                                                                                                                                                                                                                                                                                                                                                                                                                                                                                                                                                                                                                                                                                                                                                                                                                                                                                                                                                                                                                                                                                         |
| #6  | 'tuberculosis'/de OR 'lung tuberculosis'/exp                                                                                                                                                                                                                                                                                                                                                                                                                                                                                                                                                                                                                                                                                                                                                                                                                                                                                                                                                                                                                                                                                                                                                                                                                                                                                                                                                                                                                                                                                                                                                                                                                                                                                                                                                                                                                                                                                                                                                                                                                                                                                                                                                                                                                                                                                                                                                                                                                                                                                                                                                                                                                                                                                                                                                                                                                                                                                                                                                                                                                                                                                                                                                                                             |
| #7  | 'complication'/de OR 'treatment outcome'/de                                                                                                                                                                                                                                                                                                                                                                                                                                                                                                                                                                                                                                                                                                                                                                                                                                                                                                                                                                                                                                                                                                                                                                                                                                                                                                                                                                                                                                                                                                                                                                                                                                                                                                                                                                                                                                                                                                                                                                                                                                                                                                                                                                                                                                                                                                                                                                                                                                                                                                                                                                                                                                                                                                                                                                                                                                                                                                                                                                                                                                                                                                                                                                                              |

|     |                                                                                                                                                                                                                                                                                                                                                                                                                                 |
|-----|---------------------------------------------------------------------------------------------------------------------------------------------------------------------------------------------------------------------------------------------------------------------------------------------------------------------------------------------------------------------------------------------------------------------------------|
| #8  | #6 AND #7                                                                                                                                                                                                                                                                                                                                                                                                                       |
| #9  | (treated NEAR/3 tuberculosis):ab,ti                                                                                                                                                                                                                                                                                                                                                                                             |
| #10 | #6 AND 'complication'/lnk                                                                                                                                                                                                                                                                                                                                                                                                       |
| #11 | 'post tuberculosis':ab,ti OR 'post tb':ab,ti OR 'post pulmonary tuberculosis':ab,ti OR 'post pulmonary tb':ab,ti OR 'tuberculosis associated':ab,ti OR 'after tuberculosis':ab,ti OR 'history of tuberculosis':ab,ti OR 'after pulmonary tuberculosis':ab,ti OR 'following pulmonary tuberculosis':ab,ti OR 'following tuberculosis':ab,ti OR (sequelae:ab,ti AND tuberculosis:ab,ti) OR (sequela:ab,ti AND tuberculosis:ab,ti) |
| #12 | #5 OR #8 OR #9 OR #10 OR #11                                                                                                                                                                                                                                                                                                                                                                                                    |
| #13 | ((lung OR pulmonary OR airway OR respiratory) NEAR/2 disease*):ab,ti                                                                                                                                                                                                                                                                                                                                                            |
| #14 | ((respiratory OR pulmonary OR residual) NEAR/2 disability):ab,ti                                                                                                                                                                                                                                                                                                                                                                |
| #15 | 'obstructive pulmonary disease':ab,ti OR 'airflow obstruction':ab,ti OR 'airway obstruction':ab,ti                                                                                                                                                                                                                                                                                                                              |
| #16 | ((impair* OR low OR abnormal OR decline* OR declining) NEAR/2 ('lung function' OR pulmonary)):ab,ti                                                                                                                                                                                                                                                                                                                             |
| #17 | 'chronic disease'/de OR 'chronic obstructive lung disease'/exp OR 'airway obstruction'/exp OR 'forced expiratory volume'/exp OR 'lung function test'/exp OR 'breathing disorder'/de OR 'lung disease'/de                                                                                                                                                                                                                        |
| #18 | #13 OR #14 OR #15 OR #16 OR #17                                                                                                                                                                                                                                                                                                                                                                                                 |
| #19 | #12 AND #18                                                                                                                                                                                                                                                                                                                                                                                                                     |
| #20 | #4 OR #19                                                                                                                                                                                                                                                                                                                                                                                                                       |
| #21 | #3 AND #20                                                                                                                                                                                                                                                                                                                                                                                                                      |
